# Supplementary material for: Two new zinc(ii) coordination complexes with helix characteristics showing both interpenetration and self-catenation features: a platform for the synthesis of chiral and catenated structures assembled by length-modulated dicarboxylates
Source: Royal Society of Chemistry journal article supplement (doi:10.1039/c4dt01431f), 2014-01-01
Supplement: c4dt01431f1.pdf [file c4dt01431f1.pdf]

## Electronic Supporting Information (ESI)

### Two New Zinc(II) Coordination Complexes with Helix Characteristics Showing Both Interpenetration and Self-catenation Features: a Platform for Synthesis of Chiral and Catenated Structures Assembled by Length-Modulated Dicarboxylates

Yue Wang,<sup>a\*</sup> Yan Qi<sup>a</sup>, Vladislav A. Blatov<sup>b,c</sup>, Jimin, Zheng<sup>d</sup>, Qun Li<sup>a</sup> and Chao Zhang<sup>a</sup>

<sup>a</sup> College of Chemical Science and Engineering, Qingdao University, 308 Ningxia Road, Qingdao 266071, China.

<sup>b</sup> Samara Center for Theoretical Materials Science (SCTMS), Samara State University, Ac. Pavlov St. 1, Samara 443011, Russia.

<sup>c</sup> Chemistry Department, Faculty of Science, King Abdulaziz University P. O. Box 80203, Jeddah 21589, Saudi Arabia.

<sup>d</sup> Chemistry Department, Nankai University, 300071, Tianjin, China.

Table S1 Selected bond distances (Å) and angles (°) for compounds 1-2<sup>a</sup>

| 1                 |            |                   |            |                   |            |
|-------------------|------------|-------------------|------------|-------------------|------------|
| N(1)-Zn(1)        | 1.959(4)   | N(3)-Zn(1)        | 2.053(5)   | O(8)-Zn(1)#2      | 1.964(4)   |
| O(6)-Zn(1)        | 1.926(4)   | N(7)-Zn(2)        | 2.051(4)   | N(5)-Zn(2)        | 2.003(5)   |
| O(2)-Zn(2)        | 1.995(4)   | O(3)-Zn(2)#1      | 1.955(4)   |                   |            |
| O(6)-Zn(1)-N(1)   | 111.38(17) | O(6)-Zn(1)-O(8)#3 | 104.66(17) | O(3)#4-Zn(2)-O(2) | 96.98(16)  |
| N(1)-Zn(1)-O(8)#3 | 124.95(18) | O(6)-Zn(1)-N(3)   | 113.99(19) | O(3)#4-Zn(2)-N(5) | 104.49(17) |
| N(1)-Zn(1)-N(3)   | 109.02(16) | O(8)#3-Zn(1)-N(3) | 91.63(15)  | O(3)#4-Zn(2)-N(7) | 119.21(18) |
| O(2)-Zn(2)-N(5)   | 128.60(16) | O(2)-Zn(2)-N(7)   | 109.48(16) | N(5)-Zn(2)-N(7)   | 99.71(17)  |
| 2                 |            |                   |            |                   |            |
| Zn(1)-O(5)#5      | 1.931(5)   | Zn(1)-N(1)        | 1.998(5)   | Zn(1)-N(3)        | 2.007(5)   |
| Zn(1)-O(1)        | 1.943(4)   |                   |            |                   |            |
| O(5)#5-Zn(1)-O(1) | 111.2(2)   | O(5)#5-Zn(1)-N(3) | 116.6(2)   | O(1)-Zn(1)-N(1)   | 107.54(19) |
| O(5)#5-Zn(1)-N(1) | 96.8(2)    | O(1)-Zn(1)-N(3)   | 111.1(2)   | N(1)-Zn(1)-N(3)   | 112.7(2)   |

<sup>a</sup>: Symmetry transformations used to generate equivalent atoms: #1 -x+y+1,-x+1,z+1; #2 -y,x-y,z+1; #3 -x+y,-x,z-

1; #4 -y+1,x-y,z-1 for 1; #5 x-2/3,x-y-1/3,z+1/6 for 2.

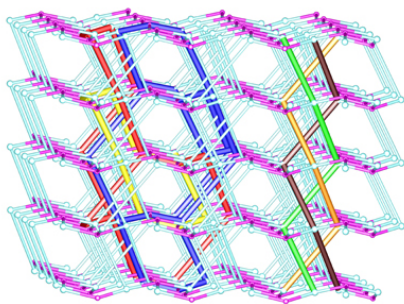

**Fig. S1.** Schematic description of the chiral (3,4)-coordinated self-catenated 3D motif  $\beta$ : light cyan spheres represent Zn<sub>2</sub> nodes, purple spheres represent tib ligands. One triple-stranded left-handed [Zn<sub>2</sub>(L<sup>2</sup>)] helical chains are highlighted in green, orange and brown. One 10-ring in yellow is catenated by five other 10-rings, including three in blue and two in red.

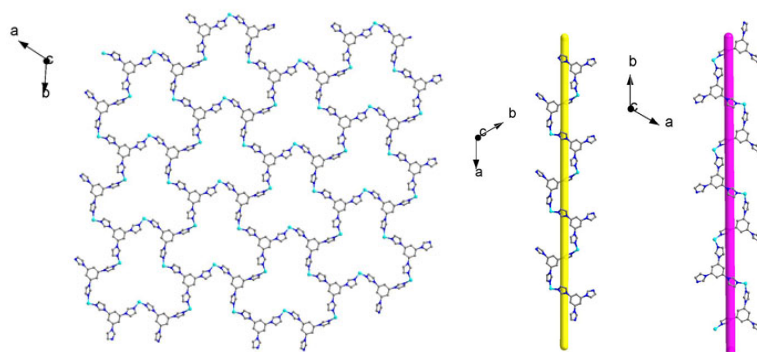

(a)

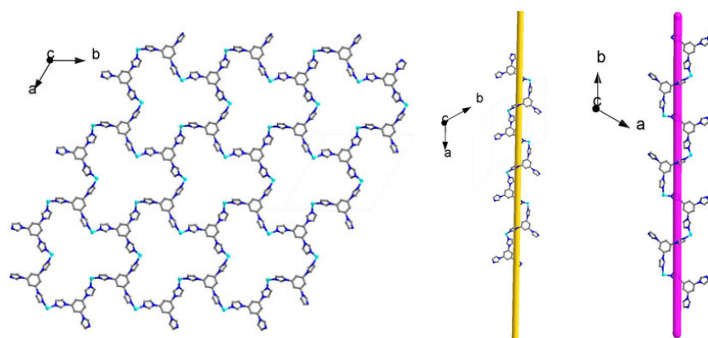

(b)

**Fig. S2.** Stick and spheres view of (a) the 2D chiral [Zn(tib)<sub>2/3</sub>]<sup>2+</sup> layer (left) in **2** containing two types of left-handed helical chains viewing along the *a*-axis (middle) and *b*-axis (right), respectively; (b) the 2D chiral [Zn(tib)<sub>2/3</sub>]<sup>2+</sup> layer (left) in **2** containing two types of right-handed helical chains viewing along the *a*-axis (middle) and *b*-axis (right), respectively.

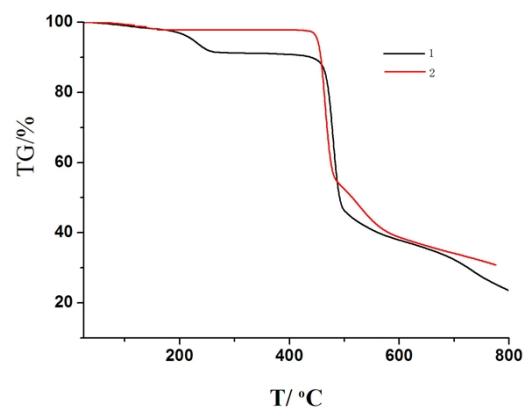

**Fig. S3.** TG plots of compounds 1-2.

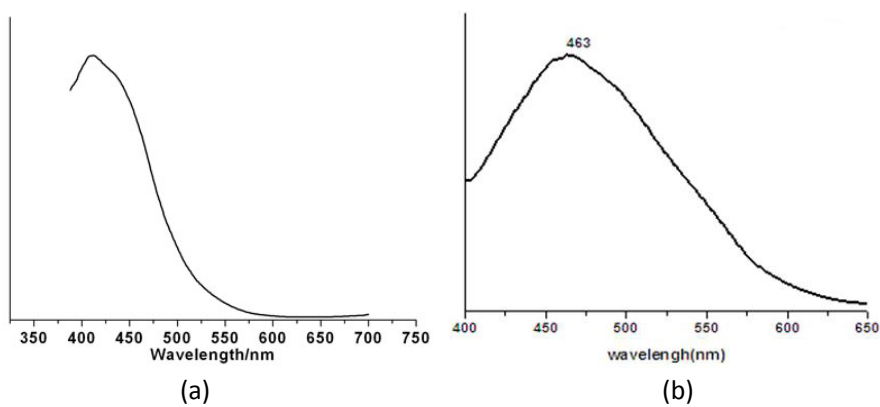

**Fig. S4** Solid-state emission spectra of compounds 1-2 (a-b).
